# Supplementary material for: CCL18 promotes breast cancer progression by exosomal miR-760 activation of ARF6/Src/PI3K/Akt pathway
Source: PubMed Central journal article supplement — Mol Ther Oncolytics. 2022 Mar 15;25:1–15. doi: 10.1016/j.omto.2022.03.004 (PMC8971730; doi:10.1016/j.omto.2022.03.004), 2022-03-15
Supplement: mmc1.pdf [file mmc1.pdf]

**OMTO, Volume 25**

**Supplemental information**

**CCL18 promotes breast cancer progression  
by exosomal miR-760 activation  
of ARF6/Src/PI3K/Akt pathway**

**Xiaojia Huang, Shengqing Lai, Fanli Qu, Zongyan Li, Xiaoyan Fu, Qian Li, Xiaofang  
Zhong, Chao Wang, and Haiyan Li**

**Table S1. The sequences of siRNAs used in this study**

| ID       | Sequence (5' -3')      |
|----------|------------------------|
| siARF6-1 | GUGGCAAUAAUAGAGUAAUTT  |
| siARF6-2 | GCGACCACUAUGAUAAUAAUTT |
| siARF6-3 | GACGCCAUAAUCCUCAUCUTT  |
| siNC     | UUCUCCGAACGUGUCACGUTT  |

**Table S2. The primer sequences for qRT-PCR used in this study**

| ID              | Sequence (5' - 3')                            |
|-----------------|-----------------------------------------------|
| GAPDH F         | TGTTTCGTCATGGGTGTGAAC                         |
| GAPDH R         | ATGGCATGGACTGTGGTCAT                          |
| H-ARF6 F        | CTTCGGGAACAAGGAAATGC                          |
| H-ARF6 R        | GTGTAGTAATGCCGCCAGAGC                         |
| U6 F            | CTCGCTTCGGCAGCACA                             |
| U6 R            | AACGCTTCACGAATTTGCGT                          |
| ALL R           | CTCAACTGGTGTCTGTGGA                           |
| hsa_miR-1246    | AAUGGAUUUUUGGAGCAGG                           |
| hsa_miR-1246 RT | CTCAACTGGTGTCTGTGGAGTCGGCAATTCAGTTGAGCCTGCTCC |
| hsa_miR-1246 F  | ACACTCCAGCTGGGAATGGATTTTTGGAG                 |
| hsa_miR-1290    | UGGAUUUUUGGAUCAGGGA                           |
| hsa_miR-1290 RT | CTCAACTGGTGTCTGTGGAGTCGGCAATTCAGTTGAGTCCCTGAT |
| hsa_miR-1290 F  | ACACTCCAGCTGGGTGGATTTTTGGATCA                 |
| hsa_miR-760     | CGGCUCUGGGUCUGUGGGGA                          |
| hsa_miR-760.RT  | CTCAACTGGTGTCTGTGGAGTCGGCAATTCAGTTGAGTCCCCACA |
| hsa_miR-760.F   | ACACTCCAGCTGGGCGGCTCTGGGTCTGTG                |
| H-AMAP1 F       | TGGCAGTGAAAAGAAGGGGTA                         |
| H-AMAP1 R       | GCATGTGAGATGGTCAGAATCC                        |

**Table S3. The mutant luciferase reporter sequences of ARF6 5' UTR**

| ID           | Sequence (5' -3')                          |
|--------------|--------------------------------------------|
| ARF6.1-MUT-F | CAAAAGCGAAATCGAGTTCCCTGGGACGTTTCAG         |
| ARF6.1-MUT-R | CTGAACGTCCCAGGGAACCTCGATTTTCGCTTTTG        |
| ARF6.2-MUT-F | CGGGCGGAGGGAATTCGTGCTAGATCTGGCGGGCACCG     |
| ARF6.2-MUT-R | CGGTGCCC GCCAGATCTAGCACGAATTCCTCCGCCCG     |
| ARF6.3-MUT-F | GCGGGCTGCCCGTGGGTGACGATGTAGGGCCCCCAGTAG    |
| ARF6.3-MUT-R | CTACTGGGGGGCCCTACAATCGTCACCCCACGGGCAGCCCCG |
| ARF6.4-MUT-F | GGGTGGGCAGGGGAGGGTGACAGGCAAAAAGAGAAAAGCAG  |
| ARF6.4-MUT-R | CTGCTTTTCTCTTTTGCCTGTACCCCTCCCCTGCCACCC    |
| ARF6.5-MUT-F | GGAAGGAGACGCTAGATCGATGACGGGTAGGCGGAGTCAG   |
| ARF6.5-MUT-R | CTGACTCGCGCCTACCCGTCATCGATCTAGCGTCTCCTTCC  |
